# Supplementary material for: Diagnostic Yield of Colon Capsule Endoscopy for Crohn’s Disease Lesions in the Whole Gastrointestinal Tract
Source: Research Square preprint supplement (doi:10.21203/rs.3.rs-119671/v1), 2020-12-09
Supplement: Supplementary file 1 [file ccc933adc8e3073592c82162.docx]

***Title***

**Diagnostic yield of colon capsule endoscopy for Crohn’s disease lesions in the whole gastrointestinal tract**

**Authors:**

Keisaku Yamada, MD1, Masanao Nakamura, MD, phD1, Takeshi Yamamura, MD, phD2, Keiko Maeda, MD, phD2, Tsunaki Sawada, MD, phD2, Yasuyuki Mizutani, MD, phD1, Eri Ishikawa MD, phD1,Takuya Ishikawa, MD, phD1, Naomi Kakushima MD, phD1,Kazuhiro Furukawa, MD, phD1, Eizaburo Ohno, MD, phD1, Hiroki Kawashima, MD, phD2, Takashi Honda, MD, phD1, Masatoshi Ishigami, MD, phD1, Mitsuhiro Fujishiro, Professor 1

**Affiliations:**

1 Department of Gastroenterology and Hepatology, Nagoya University Graduate School of Medicine. 65 Tsurumai-cho, Showa-ku, Nagoya 466-8550, Japan

2 Department of Endoscopy, Nagoya University Hospital. 65 Tsurumai-cho, Showa-ku, Nagoya 466-8550, Japan

TEL：81-52-744-2172, FAX：81-52-744-2180

Supplementary Table 1: Diagnostic yield of PCCE-2 for gastric lesion

|  | erosion | bamboo joint-like appearance |
| --- | --- | --- |
| sensitivity | 100% (6/6) | 66.7% (2/3) |
| specificity | 92.9% (13/14) | 100% (17/17) |
| PPV | 85.7% (6/7) | 100% (2/2) |
| NPV | 100% (13/13) | 94.4% (17/18) |
| accuracy | 95.0% (19/20) | 95.0% (19/20) |

PPV, positive predictive value; NPV, negative predictive value; PCCE-2, the second-generation PillCam colon capsule endoscopy

| Supplementary Table 2: Univariate logistic analysis of factors influencing incomplete PCCE-2 | | | | | |
| --- | --- | --- | --- | --- | --- |
|  | | | | | |
|  | Excretion group  (n=15) | Non-excretion group  (n=5) | OR | 95% CI | *p* value |
| Age, years  Median (range) | 41 (19-67) | 30 (20-36) | 0.89 | 0.776-1.021 | 0.097 |
| Sex, male/female | 12/3 | 3/2 | 2.667 | 0.298-23.858 | 0.38 |
| BMI, %  Median (range) | 20.7 (19-33.8) | 18.6 (15.6-26.6) | 0.849 | 0.617-1.168 | 0.314 |
| Disease location,  L1/L2/L3* | 5/10/0 | 1/4/0 | 2.000 | 0.174-22.949 | 0.578 |
| Disease duration, years  Median (range) | 6 (1-22) | 13 (1-16) | 1.030 | 0.886-1.197 | 0.701 |
| History of surgery (%) | 20 (3/15) | 60 (3/5) | 6.000 | 0.671-53.681 | 0.109 |
| CDAI,  median (range) | 117.5 (3-324) | 208 (89-213) | 1.002 | 0.99-1.013 | 0.756 |
| mSES-CD** | 4 (0-25) | 16 (4-27) | 1.155 | 1.003-1.331 | 0.046 |
| Water intake during examination, ml  Median (range) | 2500 (1900-3500) | 2000 (750-2000) | 0.993 | 0.982-1.004 | 0.237 |

**L1/L2/L3: small intestine/small intestine and colorectum/colorectum

**mSES-CD: the score that evaluates the inflammation of the small and large bowel, in which presence of stenosis was excluded from SES-CD, and applied it into the 3 segments of the small bowel, and combined with the 4 segments of the large bowel.

PCCE-2, second-generation Pillcam colon capsule endoscopy; OR, odds ratio; CI, confidence interval; BMI, body mass index; CDAI, Crohn’s disease activity index
